# Supplementary material
Source: PubMed Central journal article supplement (PMC9091137)
Supplement: 41385_2021_478_MOESM1_ESM.pdf [file 41385_2021_478_MOESM1_ESM.pdf]

Supplementary Materials:

Supplementary Figures

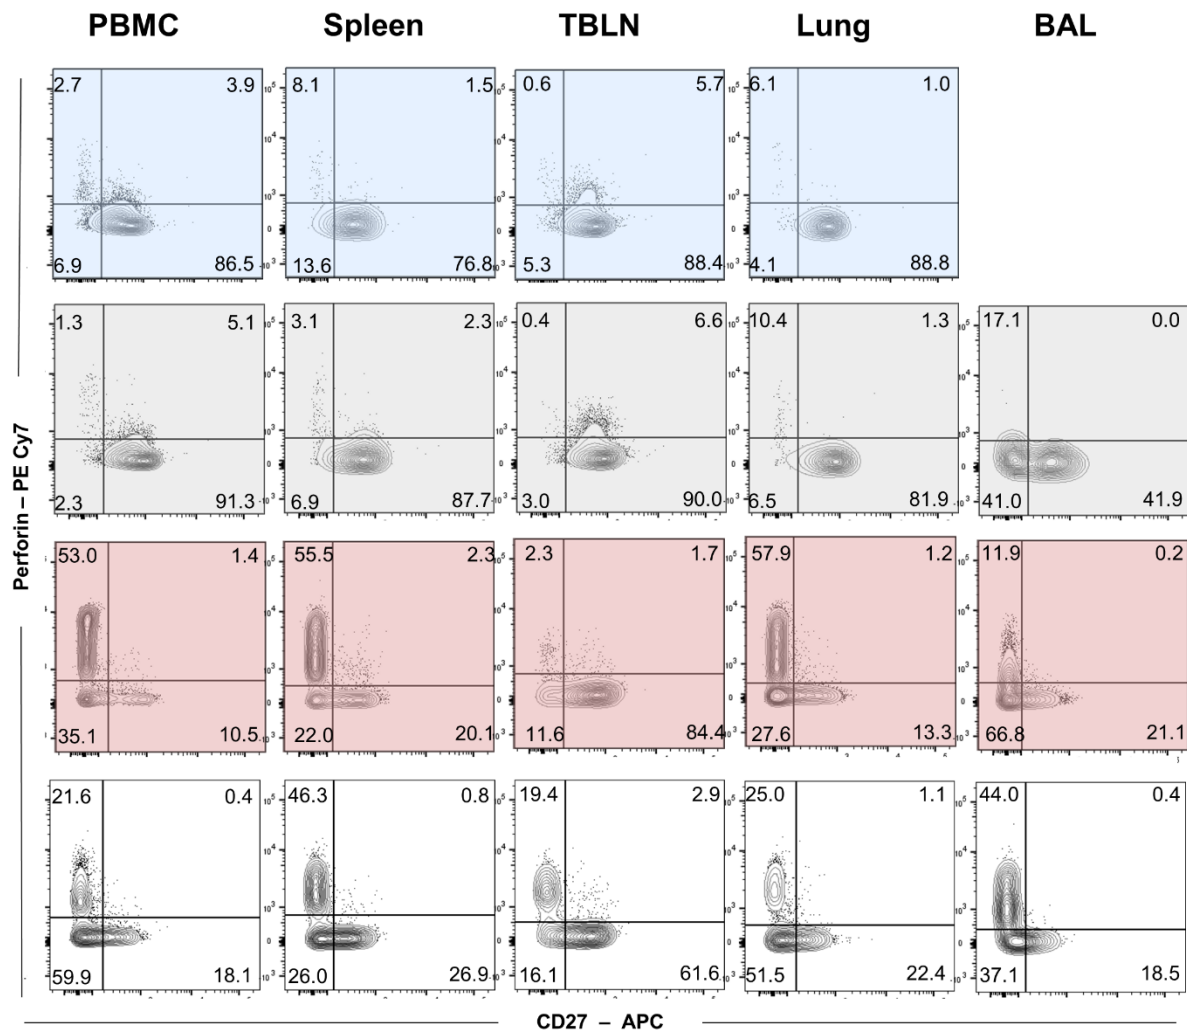

Supplementary Figure 1. Expression of perforin and CD27 in CD8 T cell subset

Representative plots showing perforin and CD27 expression in CD8 T lymphocyte subsets defined by CD45RA and CCR7 expression: naïve (CD45RA<sup>+</sup>, CCR7<sup>+</sup>, blue), TCM (CD45RA<sup>-</sup>, CCR7<sup>+</sup>, grey), TEM (CD45RA<sup>-</sup>, CCR7<sup>-</sup>, red panels) and TDE (CD45RA<sup>+</sup>, CCR7<sup>-</sup>, white panels). Each quadrant shows the mean percentage of 3 animals.

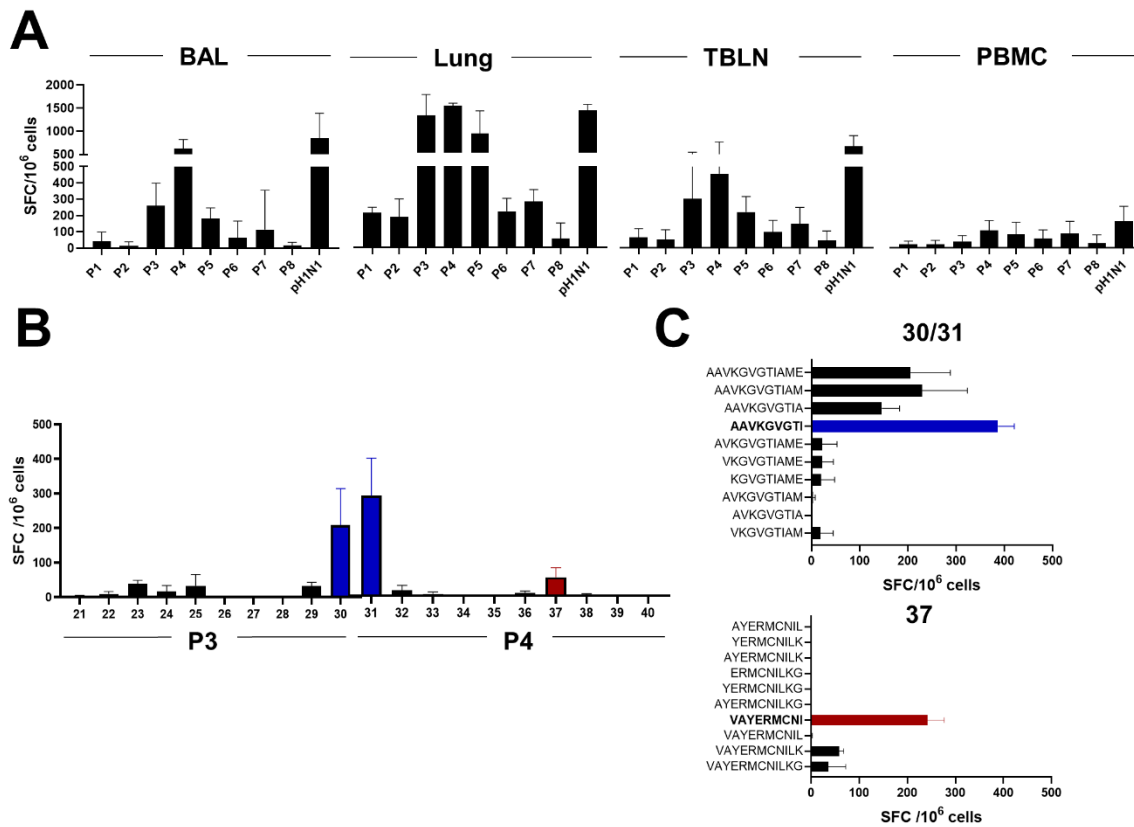

**Supplementary Figure 2. Identification of NP epitopes AAV and VAY (A)** Pools of 10 peptides of 18 amino acid (aa) length from the NP of H1N1pdm09 were used for an initial screen to stimulate cells isolated from BAL, lung, TBLN and PBMC at 13/14 DPI. Responses were measured by IFN $\gamma$  ELISpot and H1N1pdm09 (pH1N1) MOI = 1 was used as a positive control. **(B)** Spot forming cells (SFC) in TBLN after stimulation with individual peptides from pool 3 (p3) and pool 4 (p4), highlighted the peptides that subsequently identified AAV epitope (in blue) and VAY (in red). **(C)** Minimal epitope identification (using peptides of 9 aa) from peptide 30/31 (top) and 37 (bottom) identify the AAV (in blue) and VAY (in red) epitopes. Mean and SEM of 3 animals.

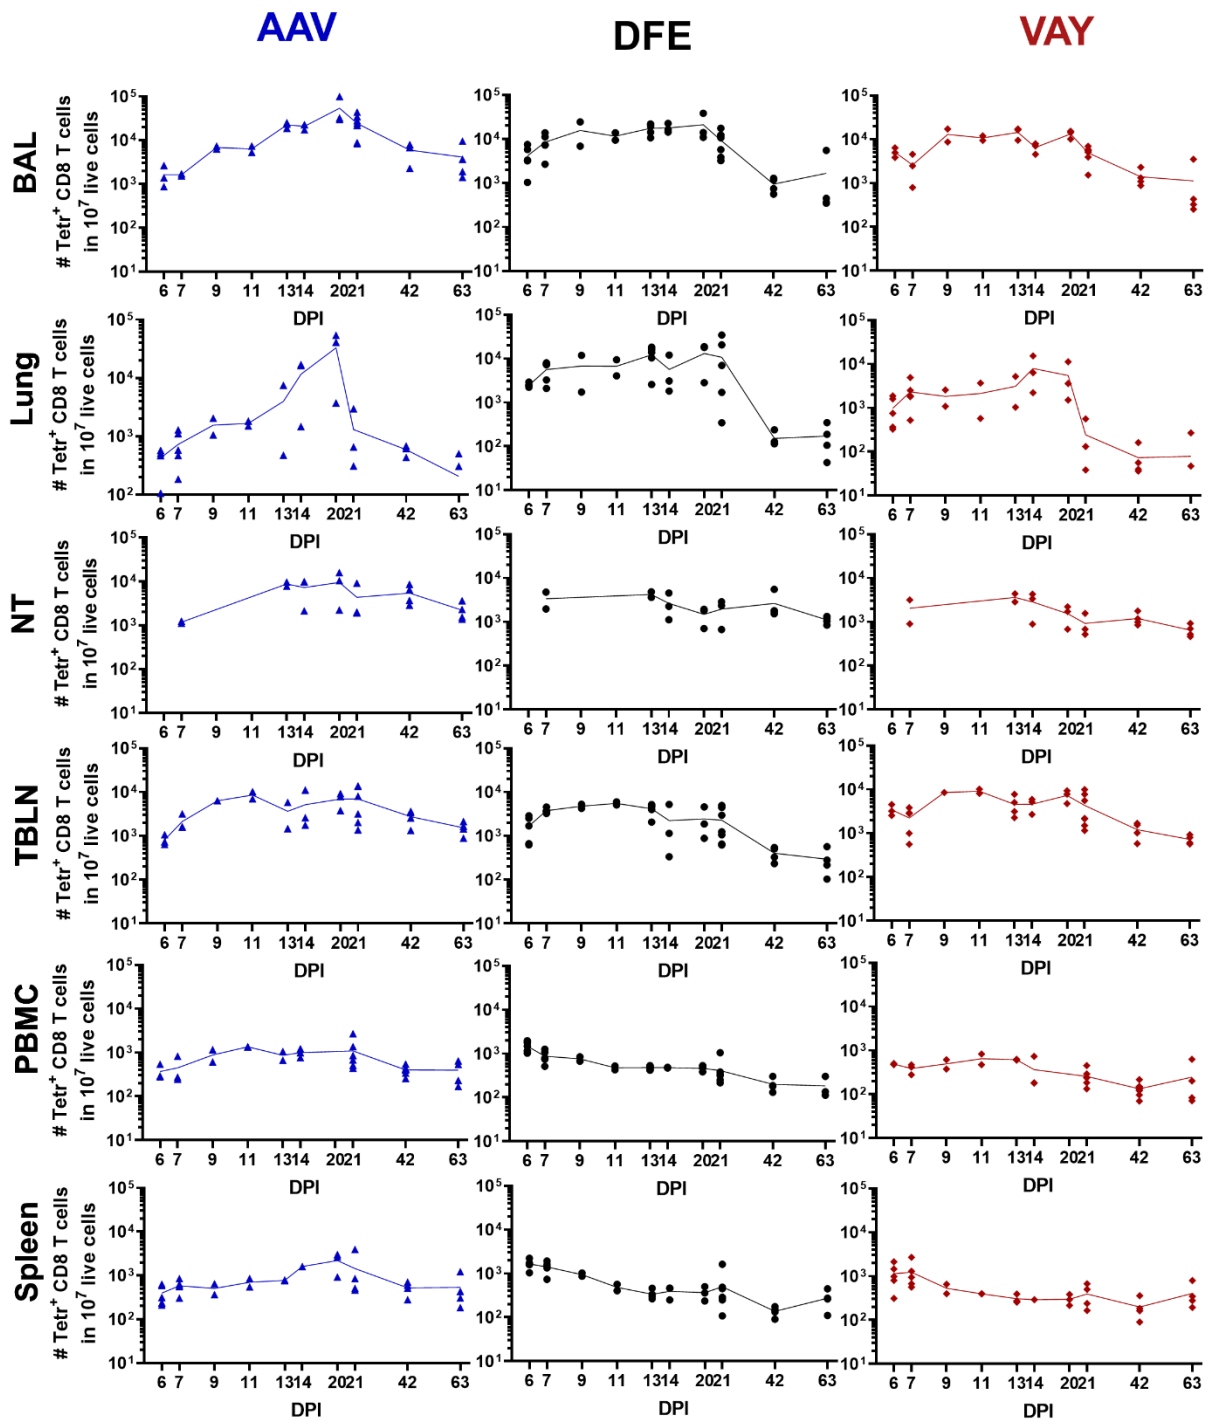

**Supplementary Figure 3. Number of tetramer<sup>+</sup> T cells in tissues** Counts of tetramers<sup>+</sup> CD8 T cells in 10 million live cells isolated from each tissues. The symbols indicates individual animals while lines connect the mean at each timepoint.

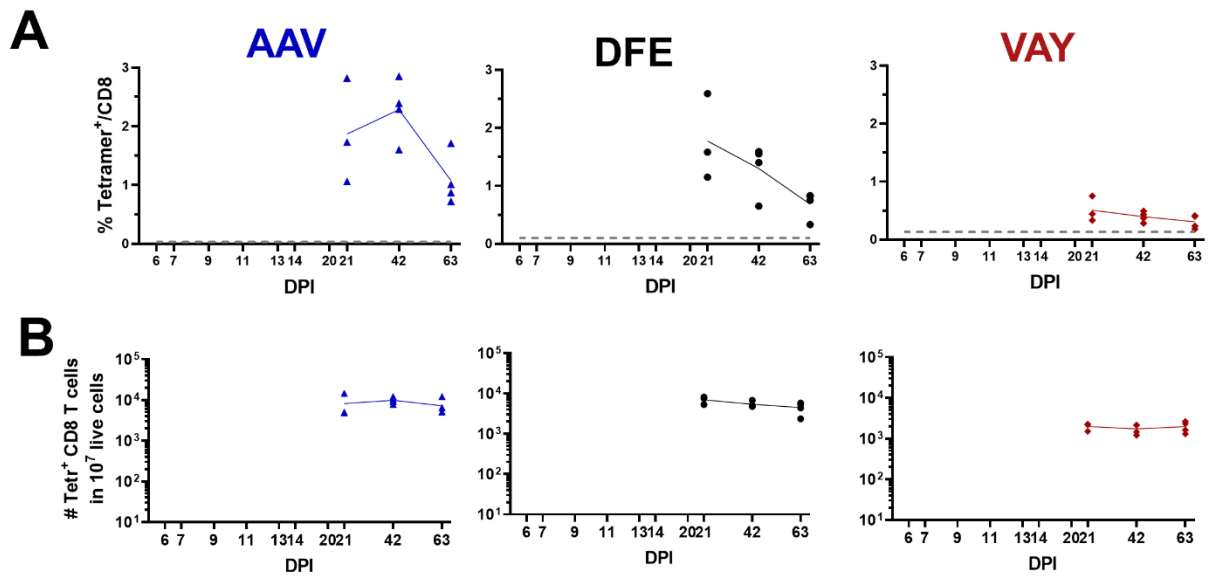

**Supplementary Figure 4. Distribution of tetramer<sup>+</sup> cells in the trachea (A)** Percentages of DFE, VAY and AAV<sup>+</sup> within CD8 T cell population at day 21, 42 and 63 post infection (n=4 in each time point) **(B)** Number of tetramer<sup>+</sup> T cells in 10 million live cells. Each symbol represent an individual and the dotted line the average % of tetramer<sup>+</sup> T cells in naïve animals.

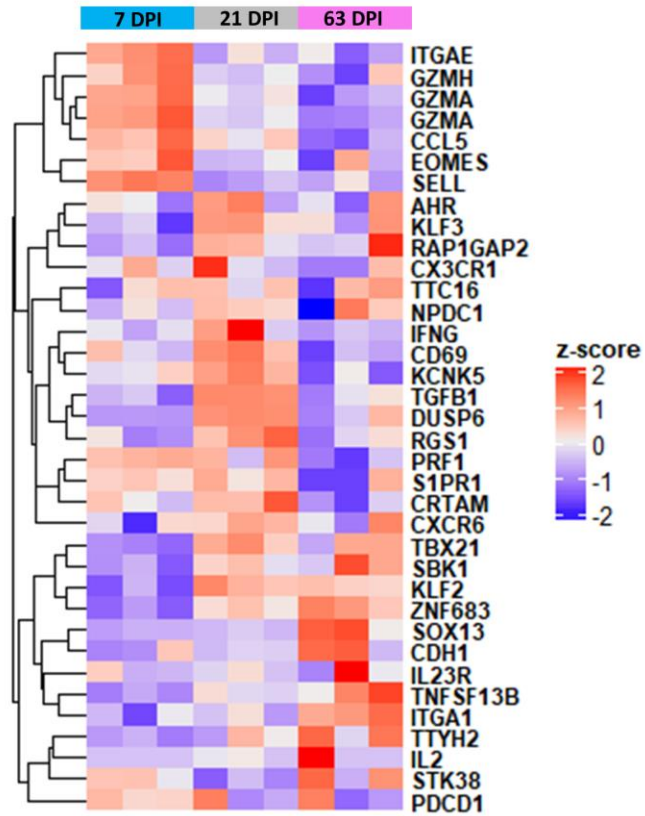

**Supplementary Figure 5. Gene expression of tissue resident memory T cells features.**

Heatmap of selected genes related to tissue resident memory T cells in BAL at 7, 21 and 63 days post infection (n=3).

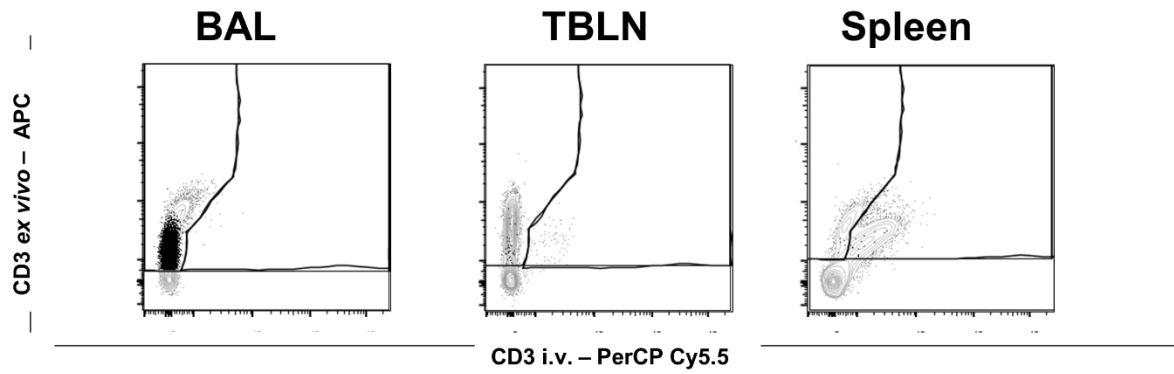

**Supplementary Figure 6. CD3 infusion for the identification of tissue resident memory T cells.** Representative FACS plots showing CD3 staining of DFE<sup>+</sup> T cells (in black) and total live lymphocytes (in grey) in BAL, TBLN and spleen of S-FLU aer immunized animal 3 weeks post boost.

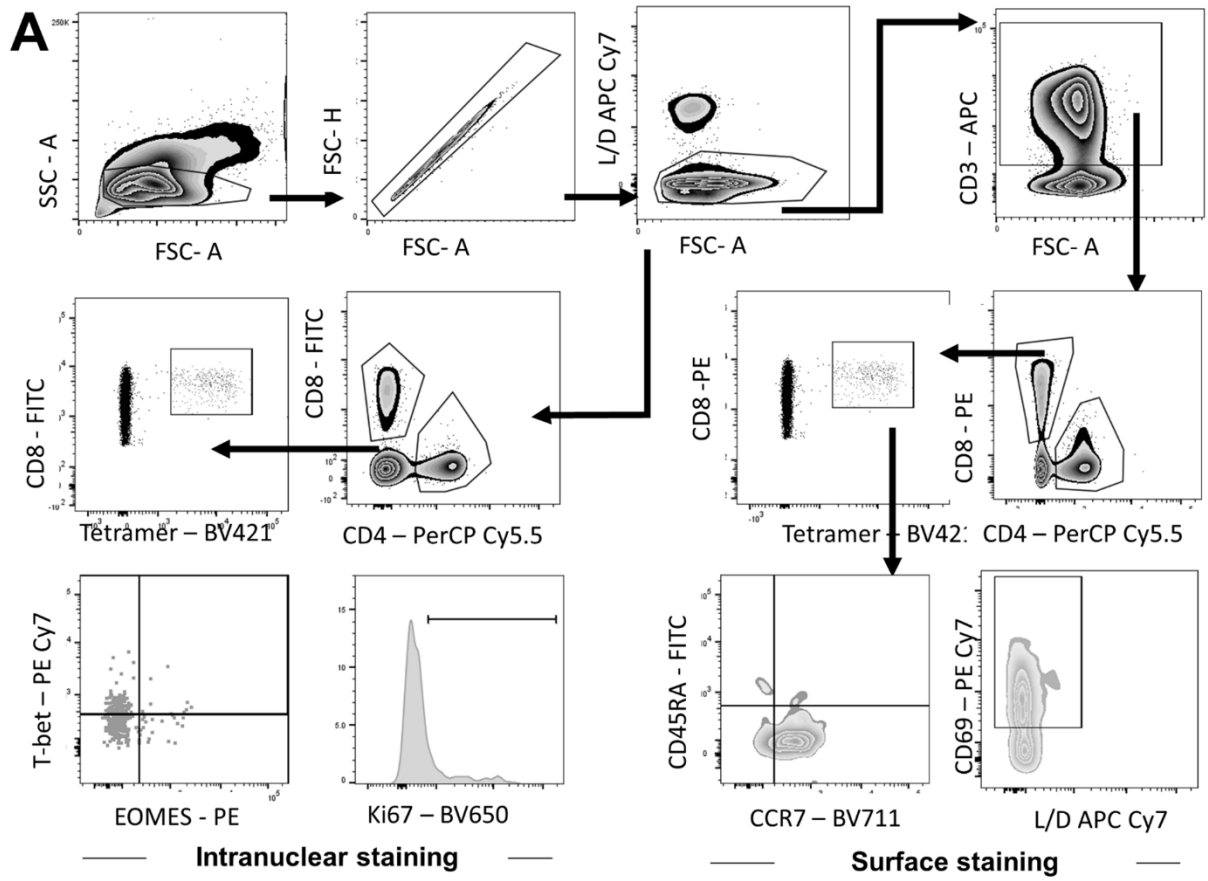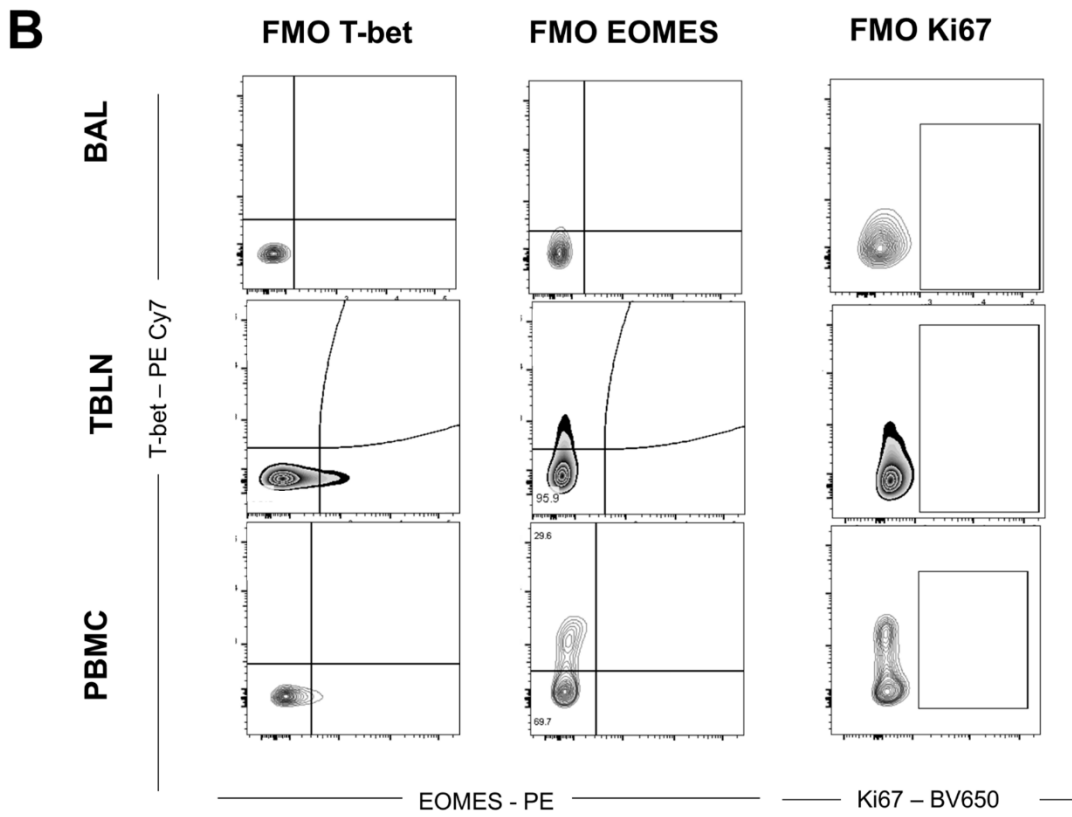

**Supplementary Figure 7. Gating strategy and controls. (A)** Representative FACS plots (from PBMC) showing the gating strategy for intranuclear staining (panels on the left) and surface marker staining (on the right.) **(B)** Fluorescence minus one (FMO) controls for transcriptional factors in the different tissues



## Supplementary Tables

**Supplementary Table 1.** Comparison of models describing the change over time in the proportion of CD8<sup>+</sup> T cells specific for each tetramer in different tissues. (The best fit model is shown in bold.)

|          | model*           |                         |                         | RSS†          | df†         | P†          |
|----------|------------------|-------------------------|-------------------------|---------------|-------------|-------------|
|          | $y_0$            | $y_{\max}$              | $t_{\max}$              |               |             |             |
| 1        | tissue, tetramer | tissue, tetramer        | tissue, tetramer        | 0.0446        | 989         | -           |
| 2        | tetramer         | tissue, tetramer        | tissue, tetramer        | 0.0475        | 1004        | <0.001      |
| 3        | tissue, tetramer | tetramer                | tissue, tetramer        | 0.0724        | 1004        | <0.001      |
| 4        | tissue, tetramer | tissue, tetramer        | tetramer                | 0.0485        | 1001        | <0.001      |
| <b>5</b> | <b>tissue</b>    | <b>tissue, tetramer</b> | <b>tissue, tetramer</b> | <b>0.0454</b> | <b>1001</b> | <b>0.12</b> |
| 6        | tissue, tetramer | tissue                  | tissue, tetramer        | 0.0558        | 1001        | <0.001      |
| 7        | tissue, tetramer | tissue, tetramer        | tissue                  | 0.0512        | 1001        | <0.001      |
| 8        | neither          | tissue, tetramer        | tissue, tetramer        | 0.0477        | 1006        | <0.001      |

\* dependence of model parameters on tissue or tetramer

† RSS - residual sum-of-squares; df - degrees of freedom; P - *P*-value for *F*-tests comparing the residual deviance for models 2-7 with that for model 1 or the residual deviance for model 8 with that for model 5

**Supplementary Table 2.** Comparison of models describing the change over time in the relative proportion of CD8<sup>+</sup> T cells specific for each tetramer in different tissues. (The best fitting model is shown in bold.)

|          | model*        |               |               |               | RSS†        | df†        | P†          |
|----------|---------------|---------------|---------------|---------------|-------------|------------|-------------|
|          | $K_1$         | $K_2$         | $b$           | $d$           |             |            |             |
| 1        | varies        | varies        | varies        | varies        | 4.62        | 116        | -           |
| 2        | common        | varies        | varies        | varies        | 13.40       | 126        | <0.001      |
| 3        | varies        | common        | varies        | varies        | 5.18        | 126        | 0.19        |
| 4        | varies        | varies        | common        | varies        | 53.13       | 126        | <0.001      |
| 5        | varies        | varies        | varies        | common        | 21.24       | 126        | <0.001      |
| <b>6</b> | <b>common</b> | <b>common</b> | <b>varies</b> | <b>varies</b> | <b>5.38</b> | <b>136</b> | <b>0.90</b> |
| 7        | varies        | common        | common        | varies        | 5.54        | 136        | 0.57        |
| 8        | varies        | common        | varies        | common        | 5.48        | 136        | 0.69        |
| 9        | common        | common        | common        | varies        | 6.44        | 146        | 0.005       |
| 10       | common        | common        | varies        | common        | 8.34        | 146        | <0.001      |

\* common - parameter independent of tissue; varies - parameter varies amongst tissues

† RSS - residual sum-of-squares; df - degrees of freedom; P - *P*-value for *F*-tests comparing the residual deviance for (i) models 2-5 with that for model 1; (ii) models 6-8 with that for model 3; or (iii) models 9-10 with that for model 6

**Supplementary Table 3.** Top 15 most significant KEGG pathways upregulated in 21DPI vs 7DPI comparison.

| <b>Gene Set</b> | <b>Pathway</b>                          | <b>Normalised enrichment score</b> | <b>FDR</b> |
|-----------------|-----------------------------------------|------------------------------------|------------|
| ssc04640        | Hematopoietic cell lineage              | 1.782321698                        | 0          |
| ssc04658        | Th1 and Th2 cell differentiation        | 1.733043263                        | 0          |
| ssc04659        | Th17 cell differentiation               | 1.695568699                        | 5.99E-04   |
| ssc05164        | Influenza A                             | 1.700025793                        | 7.99E-04   |
| ssc04668        | TNF signaling pathway                   | 1.68935987                         | 9.59E-04   |
| ssc05410        | Hypertrophic cardiomyopathy (HCM)       | 1.670102628                        | 0.00137    |
| ssc04010        | MAPK signaling pathway                  | 1.684975448                        | 0.001398   |
| ssc05202        | Transcriptional misregulation in cancer | 1.654904874                        | 0.001648   |
| ssc05418        | Fluid shear stress and atherosclerosis  | 1.64832379                         | 0.002264   |
| ssc04060        | Cytokine-cytokine receptor interaction  | 1.637482379                        | 0.003487   |
| ssc05169        | Epstein-Barr virus infection            | 1.634538696                        | 0.003595   |
| ssc04145        | Phagosome                               | 1.638094341                        | 0.003715   |
| ssc04380        | Osteoclast differentiation              | 1.623347811                        | 0.004623   |
| ssc04612        | Antigen processing and presentation     | 1.624667513                        | 0.004794   |
| ssc04350        | TGF-beta signaling pathway              | 1.607515815                        | 0.007416   |

**Supplementary Table 4.** Comparison of models describing the change over time in the proportion of T cells specific for each tetramer expressing different cell surface markers in different tissues. (The best fitting models are shown in bold.)

| model* |                  | RSS†                                  |              |              |              | df†          | P†   |        |        |        |        |
|--------|------------------|---------------------------------------|--------------|--------------|--------------|--------------|------|--------|--------|--------|--------|
| $y_0$  | $d$              | Ki67                                  | T-bet        | EOMES        | CD69         |              | Ki67 | T-bet  | EOMES  | CD69   |        |
| 1      | tissue, tetramer | tissue, tetramer                      | <b>1.792</b> | <b>1.864</b> | 0.884        | <b>2.434</b> | 262  | -      | -      | -      | -      |
| 2      | tetramer         | tissue, tetramer                      | 2.027        | 2.258        | 1.193        | 2.870        | 268  | <0.001 | <0.001 | <0.001 | <0.001 |
| 3      | tissue, tetramer | tetramer                              | 2.027        | 2.369        | 2.658        | 2.999        | 268  | <0.001 | <0.001 | <0.001 | <0.001 |
| 4      | tissue           | tissue, tetramer                      | 2.722        | 2.276        | 0.973        | 2.776        | 268  | <0.001 | <0.001 | <0.001 | <0.001 |
| 5      | tissue, tetramer | tissue                                | 2.533        | 2.408        | <b>0.889</b> | 3.228        | 268  | <0.001 | <0.001 | 0.96   | <0.001 |
| 6      | tissue, tetramer | common                                | not fitted   | not fitted   | 1.061        | not fitted   | 270  | -      | -      | <0.001 | -      |
| 7      | tissue, tetramer | PBMC: zero;<br>TBLN, BAL:<br>tetramer | not fitted   | not fitted   | not fitted   | 2.506        | 265  | -      | -      | -      | 0.05   |

\* dependence of model parameters on tissue or tetramer

† RSS - residual sum-of-squares; df - degrees of freedom; P -  $P$ -value for  $F$ -tests comparing the residual deviance for models 2-5 with that for model 1 or the residual deviance for model 6 with that for model 5

**Supplementary Table 5.** List of antibodies used.

| Antigen          | Clone            | Isotype | Fluorochrome    | Source of primary Ab                                           | Details of secondary Ab                                    |
|------------------|------------------|---------|-----------------|----------------------------------------------------------------|------------------------------------------------------------|
| CD4              | 74-12-4          | IgG2b   | PerCP-Cy5.5     | BD Biosciences                                                 |                                                            |
| CD8 $\beta$      | PPT23            | IgG1    | FITC            | Bio-Rad Laboratories                                           |                                                            |
| CD8 $\beta$      | PPT23            | IgG1    | PE              | Bio-Rad Laboratories                                           |                                                            |
| TNF              | MAb11            | IgG1    | BV421           | BioLegend                                                      |                                                            |
| IFN $\gamma$     | P2G10            | IgG1    | APC             | BD Biosciences                                                 |                                                            |
| IL-2             | A150D 3F1<br>2H2 | IgG2a   | PE-Cy7          | ThermoFisher                                                   | rat-anti-mouse, IgG2a, BioLegend                           |
| CCR7             | 3D12             | IgG2a   | BV711           | BD Biosciences                                                 |                                                            |
| CD45RA           | MIL13            | IgG1    | FITC            | Bio-Rad Laboratories                                           |                                                            |
| Annexin V        | N/A              | N/A     | BV510           | BioLegend                                                      |                                                            |
| CD69             | 01-14-22-51      | IgG2b   | PE Cy7          | Kyoto Institute of Nutrition & Pathology (Hayashi et al. 2018) | Goat-anti-mouse, BioLegend                                 |
| EOMES            | WD1928           | IgG1    | PE              | eBioscience                                                    |                                                            |
| T-bet            | eBio4B10         | IgG1    | PE Cy7          | eBioscience                                                    |                                                            |
| Ki67             | B56              | IgG1    | BV650           | BD Biosciences                                                 |                                                            |
| Perforin         | $\delta$ G9      | IgG2b   | Purified        |                                                                | Lightning-Linked PE-Cy7, antibody labelling kit, Novus Bio |
| CD27             | B30C7            | IgG1    | APC             | Bio-Rad Laboratories                                           |                                                            |
| CD14             | REA599           | IgG1    | PE              | Miltenyi Biotec                                                |                                                            |
| CD172a           | BL1H7            | IgG1    | PE              | Bio-Rad Laboratories                                           |                                                            |
| Live/Dead Marker | N/A              | N/A     | Fixable Near-IR | Life Technologies                                              |                                                            |
